# Supplementary material
Source: PubMed Central journal article supplement (PMC4932781)
Supplement: Supp_Fig1.pdf [file Supp_Fig1.pdf]

## Supplementary Data

En1<sup>+/Cre</sup>;Rosa26LoxP-stop-LoxP-LacZ mouse

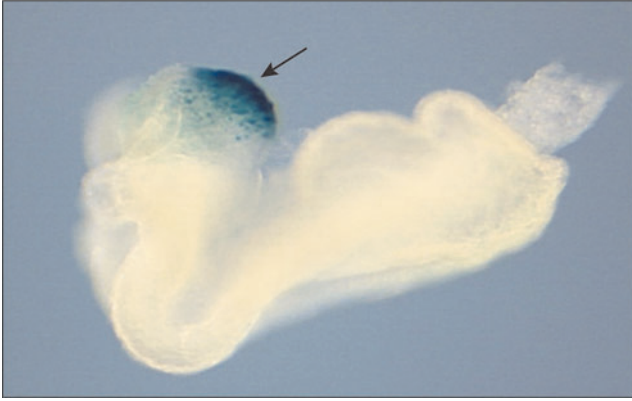

**SUPPLEMENTARY FIG. S1.** Cre activity of *En1*<sup>+/Cre</sup> mouse in the mid- and hindbrain junction. X-gal staining of an E8.5 *En1*<sup>+/Cre</sup>; *Rosa26*<sup>LoxP-stop-LoxP-LacZ</sup> mouse embryo shows that the Cre was active at the mid- and hindbrain junction.
