# Supplementary material
Source: PubMed Central journal article supplement (PMC4932781)
Supplement: Supp_Fig2.pdf [file Supp_Fig2.pdf]

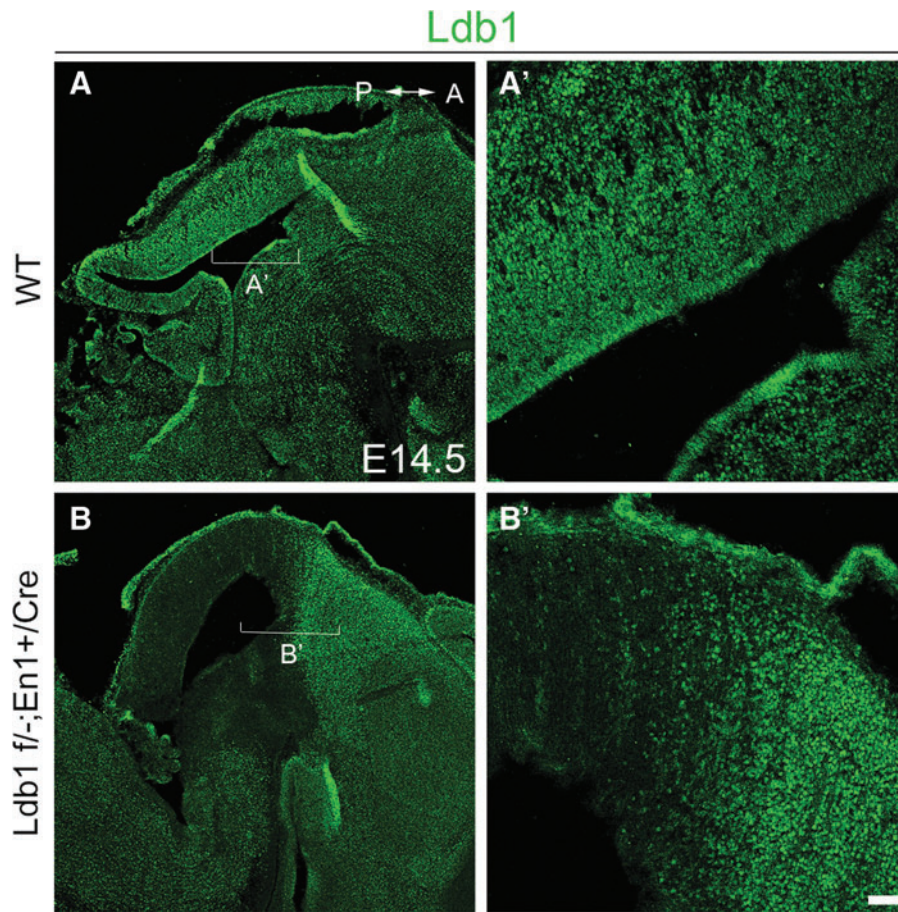

**SUPPLEMENTARY FIG. S2.** Reduced *Ldb1* expression in *Ldb1* mutant mid- and hindbrain at E14.5. In sagittal plane, the development of mid- and hindbrain is remarkably defected in *Ldb1* mutant embryo (**B**, yellow arrow) compared with WT (**A**, yellow arrow). *Ldb1* expression is ubiquitous in the entire brain in WT (**A**, **A'**). However, in the *Ldb1* mutant mid- and hindbrain, *Ldb1* expression is selectively reduced (**B**, **B'**). Scale bar=50  $\mu$ m (**B'**). A, anterior; P, posterior.
