# Supplementary material
Source: PubMed Central journal article supplement (PMC4932781)
Supplement: Supp_Fig3.pdf [file Supp_Fig3.pdf]

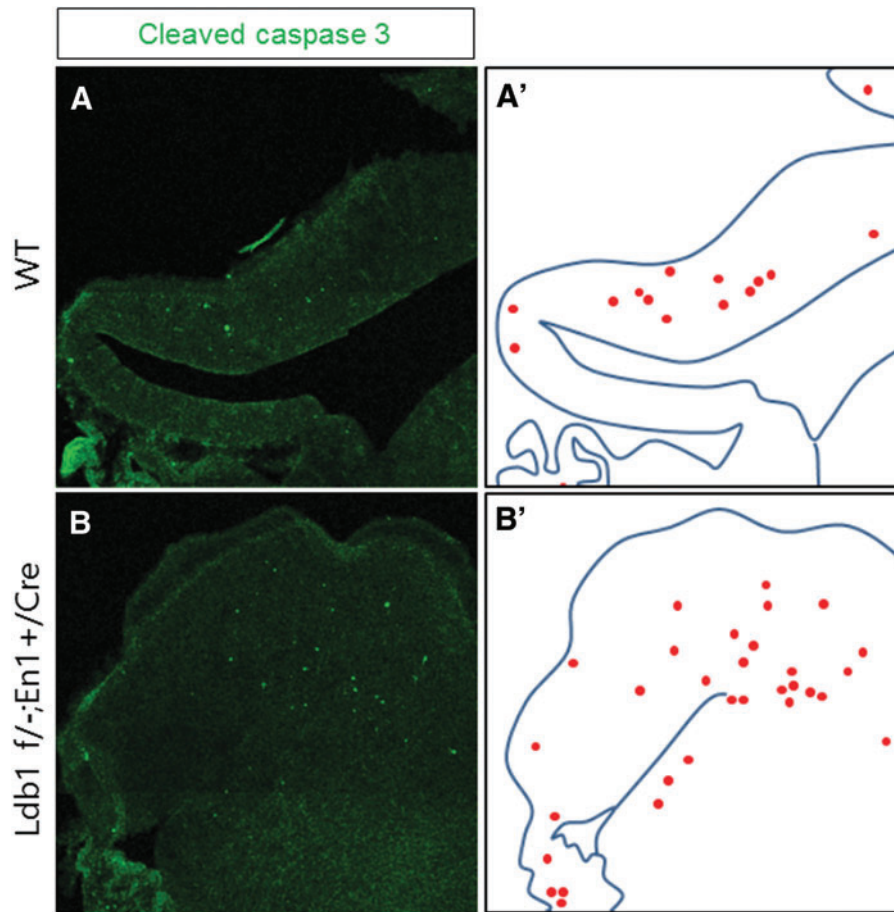

**SUPPLEMENTARY FIG. S3.** Distribution of apoptotic cell death in the midbrain of *Ldb1*<sup>f/-</sup>; *En1*<sup>+Cre</sup> mice embryo (**B**) is similar to WT embryo (**A**). *Left panels* (**A**, **B**) show the sagittal section images of cleaved caspase 3-stained midbrain (*green*) at E14.5, and *right panels* illustrate distribution of cleaved caspase 3-labeled cells (**A'**, **B'**).
