# Supplementary material
Source: PubMed Central journal article supplement (PMC4932781)
Supplement: Supp_Fig4.pdf [file Supp_Fig4.pdf]

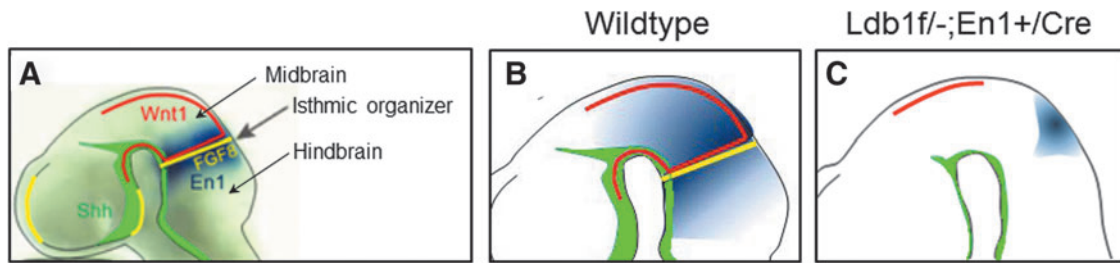

**SUPPLEMENTARY FIG. S4.** Schematic diagram of developmental defects following the absence of *Ldb1* in the mid- and hindbrain. Whole-mount in situ hybridization of *En1* in WT embryo at E9.5 (A). Enlarged brain illustration of whole-mount view to see the expression patterns in WT (B) and *Ldb1* KO embryo (C). Color indices are *blue*, *En1*; *red line*, *Wnt1*; *yellow line*, *Fgf8*; *green*, *Shh*. *Fgf8*, fibroblast growth factor 8.
